# Supplementary material
Source: Royal Society of Chemistry journal article supplement (doi:10.1039/d5va00405e)
Supplement: d5va00405e1.pdf [file d5va00405e1.pdf]

*Supplementary information to*  
**Current mixture toxicity assessments on soil organisms and applied risk  
assessments**

**Table S1 is provided as separate csv file.**

### **1. Effect classification methods and strategies**

A considerable number of the reviewed studies assessed mixtures for their null model deviations without the use of a formal risk assessment. Table S1 lists the major models for prediction, which are currently used to assess the effect of mixture toxicity on soil organisms. Most frequently, mixture models following the concept of independent action (IA) or concentration addition (CA), and the CA-derivative method of toxic unit (TU) summation, have been applied to compare predicted mixture effects to experimentally observed ones. The remaining three methods, namely the combination index(1, 2), the mixture dose-response analysis(3) and the additive index(4), base mixture effects on additivity or optionally on IA(3). This implies that the concepts do not differ fundamentally in their classification method to account for additivity. Some of the lesser applied methods comprise the isobologram method(5, 6), the median effect plot(7), the co-toxicity method(8, 9), the effect addition or concentration addition index(10, 11), the benchmark dose method(12-14) and the model deviation ratio(15, 16).

However, the threshold definitions that define whether an observed effect acts antagonistic, synergistic or is model conform vary considerably among the studies. For example, the classification can vary from as simple as judging the smallest deviation from the toxic unit concept ( $>1$  TU or  $<1$  TU) to be antagonistic or synergistic(17). Other classification systems consider some variation (combination index within factor 2 of the additivity prediction), such as the model deviation ratio(15) or statistical analyses(3). A particular finding is that the methods of the combination index and the co-toxicity coefficient tend to find more deviations from the null model, that is antagonism or synergism in experimental mixtures(6, 7, 9, 16, 18-20), than other commonly used methods such as the mixture dose-response analysis by Jonker et al. (2005)(3, 21-29). The claim of having detected synergism without an actual empirical analysis that confirms the synergism in the experimental data was the exemption(30-32).

Statistical testing has regularly been used to classify null model deviations and thus the methods and the corresponding results vary widely depending on the experimental design. Some studies relied on statistical descriptions of experimental effects using generalized linear models or generalized linear mixed models(33) to detect significant deviations via lowest sum of squares along with a Chi squared test (26, 29, 34). Others used ANOVA or similar tests for non-normal distributed tests to test for significantly different effects and set significance thresholds where effects would no longer be model conform and thus antagonistic or synergistic(35-37). Other straightforward methods are the calculation of confidence intervals of the mean effect(36, 38), where deviations that lie outside the confidence interval can be associated with effect classes (e.g.(18, 39)) or the application of the Student's t-test(35) or mean and standard deviation calculation with a comparison to a classification system(16). Some other studies directly compared calculated indices from experimental data and classified observed effects without statistical analysis for significant differences in relevant mixtures(5, 20, 30, 40-42).

The broad spectrum of applied methods to classify deviations from the null model reflect a current discussion on how to deal with statistical and biological significance of chemical mixtures but also multiple stressor exposures in experimental studies. Schäfer et al. (2023)(43) summarise that statistical significance of effect sizes from the null model is strongly dependent on the sample sizes of experiments and that detected significances not necessarily imply biological significance. For example, the frequent detection of synergistic interaction effects of mixtures in studies that applied the combination index (see above) may be caused by a limited sample size for the different tested mixtures and thus may be a statistical flaw that could be amended if the number of samples was increased to reflect experimental variation better. To avoid the shortcomings of the different approaches summarised above, it may be useful to apply standardized effect sizes like Cohen's d or Hedge's g(44) to classify null model deviations, as suggested by(43). The latter approaches are only effect size-dependent and do not rely on sample sizes.

Toxicokinetic-toxicodynamic studies have not been applied frequently for effect classification in studies with soil organisms. Toxicokinetic-toxicodynamic models add the time dependent development of

toxicity exposure as a result from single application of pesticides or their application in series(45, 46). The authors advance the General Unified Threshold model for survival (GUTS) to follow the concepts of CA or IA to enable the detection and prediction of antagonistic or synergistic effects. It provides the possibility to identify the pesticide(s) that may be responsible for the deviation from CA or IA. The proof of concept-studies demonstrate that these models are capable to predict mixture effects that deviate from CA and IA.

From this inconsistency in the definition of synergism and antagonism it appears that there is no clear convention for classification in currently applied methods for soil risk assessment of mixtures except for the agreement that deviations from the null model justify non-conformity. This observation has been noted elsewhere already(38, 47).

**Table S2: Most frequently used descriptive methods for mixture effect classification and prediction in mixture experiments with soil organisms.** The table lists methods that predict mixture effects to soil organisms and classify measured mixture toxicities as antagonistic, additive or synergistic. For the mathematical description of the methods, please refer to the referenced conceptual studies.

| Method                         | Description                                                                                                                                                                                                                                                                                                                                | Example Studies                                                                                                                                         | Conceptual reference |
|--------------------------------|--------------------------------------------------------------------------------------------------------------------------------------------------------------------------------------------------------------------------------------------------------------------------------------------------------------------------------------------|---------------------------------------------------------------------------------------------------------------------------------------------------------|----------------------|
| Concentration Addition (CA)    | Mixture effects are predicted based on the sum of concentrations of each individual chemical in mixture, which are normalised to a concentration causing the equivalent effect if present singly (e.g. EC50). The toxic unit approach is a widely applied version of CA, while the additive index is a version of the toxic unit approach. | (6, 30) (14, 17, 18, 20, 25, 26, 28-31)                                                                                                                 | (48, 49)             |
| Toxic unit (TU) summation      | Mixture effects are predicted based on the sum of the concentrations of each individual chemical in a mixture, which are normalized to their respective equi-effective concentrations if present singly (e.g. EC50).                                                                                                                       | (5, 34, 39) (additive index)(40, 50) (additive index) (51)(additive index) (17)(simple classification for additivity deviation)(14, 18, 20, 22, 23, 52) | (53)                 |
| Independent Action (IA)        | The fractional effects of each chemical concentration are summed up, assuming that each chemical in mixture is present at the equi-effective concentration as if present singly.                                                                                                                                                           | (21, 35) (11) (effect addition index used) (14, 18, 20, 22, 23, 25, 26, 28-31, 52)                                                                      | (54)                 |
| Combination Index              | A combination of the sum of single chemical concentrations provoking effect x in mixture, their fractional contribution to the observed mixture effect and the concentration that provokes effect x of each chemical, if present singly.                                                                                                   | (7, 16, 18-20, 24, 25, 27, 28, 55)                                                                                                                      | (1, 2)               |
| Mixture dose-response analysis | Specific parameters are added to the CA and IA models to account for dose level dependent and dose ratio dependent deviations in experimental observations. Model conformity, antagonistic or synergistic deviations are classified according to fitted parameter sizes.                                                                   | (26, 29, 52), (21-23, 34)                                                                                                                               | (3)                  |
| Additive Index                 | Additive index classifies biological activity (calculated from CA) as antagonistic, additive or synergistic.                                                                                                                                                                                                                               | (39, 41, 50, 51, 56, 57)                                                                                                                                | (4)                  |

Table S3, S4 and S8 are provided as separate csv file.

## 2. Overview of experimental mixture studies in soils

**Table S5: Frequencies of studied substances in mixture toxicity studies on soil organisms.** Only studies are summarised here, where the mixtures were intentionally prepared and did not depend on field sampled soils and their contamination. The substances are grouped according to their frequencies in the studies.

| Substance/Stressor                                                                                                                                                                                                                                                                                                                                                                                                                                                                                                                                                                                                                                                                                                                                                                                                                                                                                                                                                                                                                | Frequency of being tested in mixtures |
|-----------------------------------------------------------------------------------------------------------------------------------------------------------------------------------------------------------------------------------------------------------------------------------------------------------------------------------------------------------------------------------------------------------------------------------------------------------------------------------------------------------------------------------------------------------------------------------------------------------------------------------------------------------------------------------------------------------------------------------------------------------------------------------------------------------------------------------------------------------------------------------------------------------------------------------------------------------------------------------------------------------------------------------|---------------------------------------|
| chlorpyrifos                                                                                                                                                                                                                                                                                                                                                                                                                                                                                                                                                                                                                                                                                                                                                                                                                                                                                                                                                                                                                      | 17                                    |
| cadmium                                                                                                                                                                                                                                                                                                                                                                                                                                                                                                                                                                                                                                                                                                                                                                                                                                                                                                                                                                                                                           | 10                                    |
| imidacloprid                                                                                                                                                                                                                                                                                                                                                                                                                                                                                                                                                                                                                                                                                                                                                                                                                                                                                                                                                                                                                      | 10                                    |
| atrazine, glyphosate                                                                                                                                                                                                                                                                                                                                                                                                                                                                                                                                                                                                                                                                                                                                                                                                                                                                                                                                                                                                              | 8                                     |
| acetamiprid                                                                                                                                                                                                                                                                                                                                                                                                                                                                                                                                                                                                                                                                                                                                                                                                                                                                                                                                                                                                                       | 6                                     |
| abamectin, clothianidin, copper, flumioxazin, lambda-cyhalothrin, petroleum hydrocarbon                                                                                                                                                                                                                                                                                                                                                                                                                                                                                                                                                                                                                                                                                                                                                                                                                                                                                                                                           | 5                                     |
| azoxystrobin, perfluorooctanoic acid, pyrene, s-metolachlor, temperature*, zinc                                                                                                                                                                                                                                                                                                                                                                                                                                                                                                                                                                                                                                                                                                                                                                                                                                                                                                                                                   | 4                                     |
| arsenic, benzo[a]pyrene, boscalid, butachlor, carbendazim, clethodim, cypermethrin, dicamba, drought*, fipronil, lead, lindane, phoxim, siduron                                                                                                                                                                                                                                                                                                                                                                                                                                                                                                                                                                                                                                                                                                                                                                                                                                                                                   | 3                                     |
| 2-4-dichlorophenoxyacetic acid, acetochlor, deltamethrin, difenoconazole, dimethoate, epoxiconazole, fenobucarb, fluoranthene, fluoxypyr, fomesafen, geothite, ibuprofen, microplastic, oxytetracycline, perfluorooctane sulfonate, phenanthrene, pirimicarb, prochloraz, sulfamethoxazole, tetracycline, toluene                                                                                                                                                                                                                                                                                                                                                                                                                                                                                                                                                                                                                                                                                                                 | 2                                     |
| 2-4-6-trichlorophenol, 9-chloroanthracene, aldicarb, anthracene, arsenite, benzo[b]fluoranthene, bisphenol a, chlorantraniliprole, chromium, chrysene, ciprofloxacin, clofenotane, clopyralid, cyazofamid, cyhalothrin, cyproconazole, di-n-butylphthalate, di (2-ethylhexyl)phthalate, diazinon, dieldrin, diflufenican, dimoxystrobin, esfenvalerate, fenhexamid, fluroxypyr-meptyl, flutriafol, folpel., halosulfuron, hexachlorobenzene, lauryl ether sulphate, lenacil, linear alkylbenzene sulfonate, linuron, mesotrione, methyl tert-butyl ether, metolachlor, metrafenone, metribuzin, metsulfuron-methyl, napropamide, nickel, nicosulfuron, nitrogen enrichment*, nonylphenol, norfloxacin, octylphenol, oxyfluorfen, paraquat, pendimethalin, pentachlorophenol, perfluorobutane sulfonamide, picoxystrobin, polyethylene, prosulfocarb, pyraclostrobin, salinity*, sulfamethazine, tebuconazole, tetraconazole, thiacloprid, trichloroethylene, triclosan, trifluralin, xylene, zinc-oxide, zinc oxide nanoparticles | 1                                     |

\*As part of abiotic factors, these stressors (drought, temperature, salinity etc.) were also used as part of toxic mixture experiments to assess chemical exposure together with the impact of abiotic stressors.

**Table S6: Frequencies of tested soil organisms in mixture toxicity studies.** Only those studies were considered where soil organisms were exposed to chemical mixtures or along with other environmental stressors such as soil moisture content or temperature. The organisms are grouped according to their frequencies in the studies.

| Organism                                                                                                                                                                                                                                                                                                                                                                                                                                                                                                                                                                                                                                                                                                                                                                                                                               | Frequency of being used in mixture experiments |
|----------------------------------------------------------------------------------------------------------------------------------------------------------------------------------------------------------------------------------------------------------------------------------------------------------------------------------------------------------------------------------------------------------------------------------------------------------------------------------------------------------------------------------------------------------------------------------------------------------------------------------------------------------------------------------------------------------------------------------------------------------------------------------------------------------------------------------------|------------------------------------------------|
| <i>Eisenia fetida</i>                                                                                                                                                                                                                                                                                                                                                                                                                                                                                                                                                                                                                                                                                                                                                                                                                  | 35                                             |
| <i>Folsomia candida</i>                                                                                                                                                                                                                                                                                                                                                                                                                                                                                                                                                                                                                                                                                                                                                                                                                | 25                                             |
| Microbial community                                                                                                                                                                                                                                                                                                                                                                                                                                                                                                                                                                                                                                                                                                                                                                                                                    | 20                                             |
| <i>Eisenia andrei</i>                                                                                                                                                                                                                                                                                                                                                                                                                                                                                                                                                                                                                                                                                                                                                                                                                  | 8                                              |
| <i>Allium cepa</i>                                                                                                                                                                                                                                                                                                                                                                                                                                                                                                                                                                                                                                                                                                                                                                                                                     | 4                                              |
| <i>Aporrectodea caliginosa</i>                                                                                                                                                                                                                                                                                                                                                                                                                                                                                                                                                                                                                                                                                                                                                                                                         | 4                                              |
| <i>Enchytraeus crypticus</i>                                                                                                                                                                                                                                                                                                                                                                                                                                                                                                                                                                                                                                                                                                                                                                                                           | 4                                              |
| <i>Oppia nitens</i>                                                                                                                                                                                                                                                                                                                                                                                                                                                                                                                                                                                                                                                                                                                                                                                                                    | 4                                              |
| <i>Glycine max</i> (varieties <i>sculptor 000</i> and <i>don mario 67i70 ipro</i> )                                                                                                                                                                                                                                                                                                                                                                                                                                                                                                                                                                                                                                                                                                                                                    | 3                                              |
|                                                                                                                                                                                                                                                                                                                                                                                                                                                                                                                                                                                                                                                                                                                                                                                                                                        |                                                |
| <i>Lumbricus rubellus</i>                                                                                                                                                                                                                                                                                                                                                                                                                                                                                                                                                                                                                                                                                                                                                                                                              | 3                                              |
| <i>Raphanus sativus</i>                                                                                                                                                                                                                                                                                                                                                                                                                                                                                                                                                                                                                                                                                                                                                                                                                | 3                                              |
| <i>Allolobophora chlorotica</i>                                                                                                                                                                                                                                                                                                                                                                                                                                                                                                                                                                                                                                                                                                                                                                                                        | 2                                              |
| <i>Caenorhabditis elegans</i>                                                                                                                                                                                                                                                                                                                                                                                                                                                                                                                                                                                                                                                                                                                                                                                                          | 2                                              |
| <i>Hypoaspis aculeifer</i>                                                                                                                                                                                                                                                                                                                                                                                                                                                                                                                                                                                                                                                                                                                                                                                                             | 2                                              |
| <i>Lactuca sativa</i> (one unspecified variety and <i>crispa</i> )                                                                                                                                                                                                                                                                                                                                                                                                                                                                                                                                                                                                                                                                                                                                                                     | 2                                              |
| <i>Lumbricus terrestris</i>                                                                                                                                                                                                                                                                                                                                                                                                                                                                                                                                                                                                                                                                                                                                                                                                            | 2                                              |
| <i>Sorghum bicolor</i>                                                                                                                                                                                                                                                                                                                                                                                                                                                                                                                                                                                                                                                                                                                                                                                                                 | 2                                              |
| <i>Arabidopsis thaliana</i> , <i>Brassica chinensis</i> , <i>Cantareus aspersus</i> , <i>Carum carvi</i> , <i>Centaurea jacea</i> , <i>Cucumis sativus</i> , <i>Dactylis glomerata</i> , <i>Earthworm</i> (not specified), <i>Earthworm community</i> (not specified), <i>Elymus lanceolatus</i> , <i>Enchylaena tomentosa</i> , <i>Enchytraeus albidus</i> , <i>Folsomia fimetaria</i> , <i>Galium mollugo</i> , <i>Iseilema membranaceum</i> , <i>Lolium multiflorum</i> , <i>Lycopersicum esculentum</i> , <i>Medicago sativa</i> , <i>Metaphire sieboldi</i> , <i>Medicago truncatula</i> , <i>Perionyx excavatus</i> , <i>Picea glauca</i> , <i>Pinus banksiana</i> , <i>Porcellionides pruinosus</i> , <i>Rice</i> (not specified), <i>Silene latifolia</i> , <i>Sinapis alba</i> , <i>Sorghum saccharatum</i> , <i>Zea mays</i> | 1                                              |

**Table S7: Frequencies of measured toxicity endpoints in mixture toxicity studies.** 46 relevant studies were found under the criterion that soil organisms were exposed to chemical mixtures or along with other environmental stressors such as soil moisture or temperature. The endpoints are grouped according to their frequencies in the studies.

| <b>Endpoint</b>                                                                      | <b>Frequency of being quantified in mixture experiments</b> |
|--------------------------------------------------------------------------------------|-------------------------------------------------------------|
| Mortality                                                                            | 53                                                          |
| Biomarker                                                                            | 41                                                          |
| Reproduction                                                                         | 37                                                          |
| Seed germination                                                                     | 25                                                          |
| Plant growth                                                                         | 21                                                          |
| Bioaccumulation                                                                      | 16                                                          |
| Growth, Bacteria abundance & diversity                                               | 14                                                          |
| Avoidance                                                                            | 12                                                          |
| Fungi abundance & diversity                                                          | 8                                                           |
| Mycorrhization                                                                       | 6                                                           |
| Biomass                                                                              | 5                                                           |
| Plant health,                                                                        | 43                                                          |
| Microbial activity, Decomposition rate, Trophic Links, Archaea abundance & diversity | 3                                                           |
| Neuronal functionality, Weight                                                       | 2                                                           |
| Biodiversity, Protist abundance & diversity, Root elongation                         | 1                                                           |

### 3. Novel Prediction methods

Other studies experimented with multiple stressor exposure, that is chemical exposure was combined with an environmental stressor such as temperature or soil moisture/drought. These studies used effect assessment models, which were not limited to CA only. One mesocosm study examined the pesticide mixture effects of different application modes of up to ten pesticides on soil microbial ecosystem services (e.g. litter decomposition (tea bag index), soil aggregate stability and aggregate size) by the quantification of using multivariate analysis along with a range of null models to assess pesticide interactions.(58) Another study conducted a similar mesocosm test with effect analysis but included ten various stressors comprising temperature, nitrogen enrichment, drought, salinity, microplastics and exposure to an antibiotic, an insecticide, a herbicide, a fungicide and a heavy metal.(59) The null models applied in both studies were an additive model, a multiplicative model and a dominative model, which, like most other approaches discussed, relies on single chemical exposure data (bottom-up approach). In their assumptions the additive and the multiplicative model are the equivalents to CA and IA, respectively, while the dominative model only selects the strongest effect size within a stressor combination to predict combined effects.(60) By selecting multiple possibilities as null models the authors argued for detecting synergistic or antagonistic effects if none of the model-predicted effect sizes were outside of the calculated confidence intervals.(59)

The concept of stress addition is another approach capable to consider different types of stressors that go beyond chemical exposure.(61) It assumes that each individual has a stress capacity, which is “used up” to different degrees by different types of stressors, which are summed up to represent the overall stress impact. The approach assumes that all stressors on an organism can be normalised to identical units and act additively. However, the approach’s caveat is that it requires full information about the stressor intensity and the effect in the organism from single exposures in order to be versatile and usable in multiple stressor studies. If these data are available, it is deemed that the model is capable for effect prediction equivalent to the CA and IA approaches.(62)

Overall, the inclusion of other environmental stressors together with chemical exposure in soil studies are not frequent.(21, 33, 58, 59, 62-64) This is likely caused by the strong link of the ecotoxicological discipline to chemical regulatory background, which currently considers exclusively chemical exposure as the only stressor to ecosystem health, ignoring all other non-chemical sources.(43) A more holistic ecological risk assessment approach including environmental stressors would be more relevant and likely more robust in terms of assessing the observed effects and the discussed models may provide a better foundation for predicting and mitigating risk to soil organisms from chemical mixtures. Yet, the effect quantification of environmental factors like humidity and temperature in different soil types on representative soil organisms are largely lacking. These data need to be generated to consider them in a holistic assessment together with chemical toxicity data, which would benefit the realism of a MRA. One new experimental indicator,  $E_{mix}$ , has been proposed to integrate multiple biomarker quantifications upon mixture exposure to metals and PPP residues in earthworms into one indicator along with multivariate analysis.(65) The use of  $E_{mix}$  as an indicator for exposure risk, however, is currently impractical, since a risk framework for the indicator is lacking as well as clear correlations of the indicator with exposure concentrations in the multivariate analysis. More investigations on the suitability of this indicator will give a clearer picture about its usability.

## References

1. Chou T-C, Talalay P. Generalized Equations for the Analysis of Inhibitions of Michaelis-Menten and Higher-Order Kinetic Systems with Two or More Mutually Exclusive and Nonexclusive Inhibitors. *Eur J Biochem.* 1981;115(1):207-16.
2. Chou T-C, Talalay P. Analysis of combined drug effects: a new look at a very old problem. *Trends Pharmacol Sci.* 1983;4:450-4.
3. Jonker MJ, Svendsen C, Bedaux JJM, Bongers M, Kammenga JE. Significance testing of synergistic/antagonistic, dose level-dependent, or dose ratio-dependent effects in mixture dose-response analysis. *Environ Toxicol Chem.* 2005;24(10):2701-13.
4. Marking LL. Toxicity of chemical mixtures. In: Rand GM, Petrocelli SR, editors. *Fundamentals of aquatic toxicology, methods and applications.* Washington, DC: Hemisphere Publishing Corporation; 1984. p. 164-76.
5. Jensen J, Sverdrup LE. Joint Toxicity of Linear Alkylbenzene Sulfonates and Pyrene on *Folsomia fimetaria*. *Ecotoxicol Environ Saf.* 2002;52(1):75-81.
6. Samadi Kalkhoran E, Alebrahim MT, Mohammaddoust Chamn Abad HR, Streibig JC, Ghavidel A, Tseng T-MP. The Survival Response of Earthworm (*Eisenia fetida* L.) to Individual and Binary Mixtures of Herbicides. *Toxics.* 2022;10(6):320.
7. Nistala S, Kumar A. Effect of toxicological interaction of chlorpyrifos, cypermethrin, and arsenic on soil dehydrogenase activity in the terrestrial environment. *Ecotoxicology.* 2023;32(5):606-17.
8. Sun Y-P, Johnson ER. Analysis of Joint Action of Insecticides Against House Flies. *Journal of Economic Entomology.* 1960;53(5):887-92.
9. Teng M, Zhao X, Wang C, Zhou L, Wu X, Wu F. Combined toxicity of chlorpyrifos, abamectin, imidacloprid, and acetamiprid on earthworms (*Eisenia fetida*). *Environmental Science and Pollution Research.* 2022;29(36):54348-58.
10. Zhang J, Liu S-S, Zhang J, Qin L-T, Deng H-P. Two novel indices for quantitatively characterizing the toxicity interaction between ionic liquid and carbamate pesticides. *Journal of Hazardous Materials.* 2012;239-240:102-9.
11. Wang Z, Qi F, Shi Y, Zhang Z, Liu L, Li C, et al. Evaluation of single and joint toxicity of perfluorooctanoic acid and arsenite to earthworm (*Eisenia fetida*): A multi-biomarker approach. *Chemosphere.* 2022;291:132942.
12. Crump KS. A new method for determining allowable daily intakes. *Fundamental and Applied Toxicology.* 1984;4(5):854-71.
13. Yang G, Li J, Wang Y, Chen C, Zhao H, Shao K. Quantitative ecotoxicity analysis for pesticide mixtures using benchmark dose methodology. *Ecotoxicol Environ Saf.* 2018;159:94-101.
14. Yang L, Feng Y-X, Zhang H, Yu X-Z. Estimating the synergistic and antagonistic effects of dual antibiotics on plants through root elongation test. *Ecotoxicology.* 2021;30(8):1598-609.
15. Belden JB, Gilliom RJ, Lydy MJ. How well can we predict the toxicity of pesticide mixtures to aquatic life? *Integr Environ Assess Manage.* 2007;3(3):364-72.
16. Pescatore T, Di Nica V, Finizio A, Ademollo N, Spataro F, Raueo J, et al. Sub-lethal effects of soil multiple contamination on the avoidance behaviour of *Eisenia fetida*. *Ecotoxicol Environ Saf.* 2021;226:112861.
17. An Y-J, Lee W-M. Comparative and combined toxicities of toluene and methyl tert-butyl ether to an Asian earthworm *Perionyx excavatus*. *Chemosphere.* 2008;71(3):407-11.
18. Chen C, Wang Y, Zhao X, Qian Y, Wang Q. Combined toxicity of butachlor, atrazine and  $\lambda$ -cyhalothrin on the earthworm *Eisenia fetida* by combination index (CI)-isobologram method. *Chemosphere.* 2014;112:393-401.
19. González-Naranjo V, Boltes K. Toxicity of ibuprofen and perfluorooctanoic acid for risk assessment of mixtures in aquatic and terrestrial environments. *International Journal of Environmental Science and Technology.* 2014;11(6):1743-50.
20. Chen C, Wang Y, Qian Y, Zhao X, Wang Q. The synergistic toxicity of the multiple chemical mixtures: Implications for risk assessment in the terrestrial environment. *Environ Int.* 2015;77:95-105.
21. Long SM, Reichenberg F, Lister LJ, Hankard PK, Townsend J, Mayer P, et al. Combined chemical (Fluoranthene) and drought effects on *Lumbricus rubellus* demonstrate the applicability of the independent action model for multiple stressor assessment. *Environ Toxicol Chem.* 2009;28(3):629-36.
22. Loureiro S, Amorim MJB, Campos B, Rodrigues SMG, Soares AMVM. Assessing joint toxicity of chemicals in *Enchytraeus albidus* (Enchytraeidae) and *Porcellionides pruinosus* (Isopoda) using avoidance behaviour as an endpoint. *Environ Pollut (Oxford, U K).* 2009;157(2):625-36.
23. Lister LJ, Svendsen C, Wright J, Hooper HL, Spurgeon DJ. Modelling the joint effects of a metal and a pesticide on reproduction and toxicokinetics in Lumbricid earthworms. *Environ Int.* 2011;37(4):663-70.
24. Yang G, Chen C, Wang Y, Cai L, Kong X, Qian Y, et al. Joint toxicity of chlorpyrifos, atrazine, and cadmium at lethal concentrations to the earthworm *Eisenia fetida*. *Environmental Science and Pollution Research.* 2015;22(12):9307-15.
25. Yang G, Chen C, Wang Y, Peng Q, Zhao H, Guo D, et al. Mixture toxicity of four commonly used pesticides at different effect levels to the epigeic earthworm, *Eisenia fetida*. *Ecotoxicol Environ Saf.* 2017;142:29-39.
26. Gainer A, Cousins M, Hogan N, Siciliano SD. Petroleum hydrocarbon mixture toxicity and a trait-based approach to soil invertebrate species for site-specific risk assessments. *Environ Toxicol Chem.* 2018;37(8):2222-34.
27. Uwizeyimana H, Wang M, Chen W, Khan K. Ecotoxicological effects of binary mixtures of siduron and Cd on mRNA expression in the earthworm *Eisenia fetida*. *Sci Total Environ.* 2018;610-611:657-65.
28. Yang G, Chen C, Yu Y, Zhao H, Wang W, Wang Y, et al. Combined effects of four pesticides and heavy metal chromium (VI) on the earthworm using avoidance behavior as an endpoint. *Ecotoxicol Environ Saf.* 2018;157:191-200.

29. Gainer A, Hogan N, Siciliano SD. Soil invertebrate avoidance behavior identifies petroleum hydrocarbon contaminated soils toxic to sensitive plant species. *Journal of Hazardous Materials*. 2019;361:338-47.
30. Schnug L, Leinaas HP, Jensen J. Synergistic sub-lethal effects of a biocide mixture on the springtail *Folsomia fimetaria*. *Environ Pollut (Oxford, U K)*. 2014;186:158-64.
31. Jiang R, Wang M, Chen W, Li X. Ecological risk evaluation of combined pollution of herbicide siduron and heavy metals in soils. *Sci Total Environ*. 2018;626:1047-56.
32. Wang H-T, Chi Q-Q, Zhu D, Li G, Ding J, An X-L, et al. Arsenic and Sulfamethoxazole Increase the Incidence of Antibiotic Resistance Genes in the Gut of Earthworm. *Environ Sci Technol*. 2019;53(17):10445-53.
33. Pitombeira de Figueirêdo L, Athayde DB, Daam MA, van Gestel CAM, Guerra GdS, Duarte-Neto PJ, et al. Impact of temperature on the toxicity of Kraft 36 EC® (a.s. abamectin) and Score 250 EC® (a.s. difenoconazole) to soil organisms under realistic environmental exposure scenarios. *Ecotoxicol Environ Saf*. 2020;194:110446.
34. Gomez-Eyles JL, Svendsen C, Lister L, Martin H, Hodson ME, Spurgeon DJ. Measuring and modelling mixture toxicity of imidacloprid and thiacloprid on *Caenorhabditis elegans* and *Eisenia fetida*. *Ecotoxicol Environ Saf*. 2009;72(1):71-9.
35. García-Gómez C, Babín M, García S, Almendros P, Pérez RA, Fernández MD. Joint effects of zinc oxide nanoparticles and chlorpyrifos on the reproduction and cellular stress responses of the earthworm *Eisenia andrei*. *Sci Total Environ*. 2019;688:199-207.
36. Oliveira KMGd, Carvalho EHds, Santos Filho Rd, Sivek TW, Thá EL, Souza IRd, et al. Single and mixture toxicity evaluation of three phenolic compounds to the terrestrial ecosystem. *Journal of Environmental Management*. 2021;296:113226.
37. Gruss I, Cwielağ-Piasecka I, Bączek P, Twardowski J, Jędrzejewski S, Twardowska K, et al. Reproduction, growth, and survival responses of *Eisenia fetida* and *Folsomia candida* to individual and combined pesticide exposures. *Environmental Toxicology and Pharmacology*. 2025;120:104844.
38. Hertzberg RC, MacDonell MM. Synergy and other ineffective mixture risk definitions. *Sci Total Environ*. 2002;288(1):31-42.
39. Cang T, Dai D, Yang G, Yu Y, Lv L, Cai L, et al. Combined toxicity of imidacloprid and three insecticides to the earthworm, *Eisenia fetida* (Annelida, Oligochaeta). *Environmental Science and Pollution Research*. 2017;24(9):8722-30.
40. Chen C, Wang Y, Zhao X, Wang Q, Qian Y. Comparative and combined acute toxicity of butachlor, imidacloprid and chlorpyrifos on earthworm, *Eisenia fetida*. *Chemosphere*. 2014;100:111-5.
41. Liu X, Jia F, Lv L, Mao L, Chu T, Wang Y. Joint toxic mechanism of clothianidin and prochloraz in the earthworm (*Eisenia fetida*). *Chemosphere*. 2024;359:142250.
42. Zhang S-N, Zhou Y-T, Xia J, Wang Y-M, Ma J-W, Wang L-K, et al. Combined effects of cadmium and sulfamethoxazole on *Eisenia fetida*: Insights into accumulation, subcellular partitioning, biomarkers and toxicological responses. *Sci Total Environ*. 2024;935:173303.
43. Schäfer RB, Jackson M, Juvigny-Khenafou N, Osakpolor SE, Posthuma L, Schneeweiss A, et al. Chemical Mixtures and Multiple Stressors: Same but Different? *Environ Toxicol Chem*. 2023;42(9):1915-36.
44. Jackson MC. Interactions among multiple invasive animals. *Ecology*. 2015;96(8):2035-41.
45. Bart S, Short S, Jager T, Eagles EJ, Robinson A, Badder C, et al. How to analyse and account for interactions in mixture toxicity with toxicokinetic-toxicodynamic models. *Sci Total Environ*. 2022;843:157048.
46. Bart S, Jager T, Robinson A, Lahive E, Spurgeon DJ, Ashauer R. Predicting Mixture Effects over Time with Toxicokinetic–Toxicodynamic Models (GUTS): Assumptions, Experimental Testing, and Predictive Power. *Environ Sci Technol*. 2021;55(4):2430-9.
47. Martin O, Scholze M, Ermler S, McPhie J, Bopp SK, Kienzler A, et al. Ten years of research on synergisms and antagonisms in chemical mixtures: A systematic review and quantitative reappraisal of mixture studies. *Environ Int*. 2021;146:106206.
48. Loewe S, Muischnek H. Über Kombinationswirkungen. *Naunyn-Schmiedebergs Archiv für experimentelle Pathologie und Pharmakologie*. 1926;114(5):313-26.
49. Berenbaum MC. The expected effect of a combination of agents: the general solution. *Journal of Theoretical Biology*. 1985;114(3):413-31.
50. Yu Y, Li X, Yang G, Wang Y, Wang X, Cai L, et al. Joint toxic effects of cadmium and four pesticides on the earthworm (*Eisenia fetida*). *Chemosphere*. 2019;227:489-95.
51. Lopes Alves PR, de Araújo RS, Ogliari Bandeira F, Matias WG. Individual and combined toxicity of imidacloprid and two seed dressing insecticides on collembolans *Folsomia candida*. *Journal of Toxicology and Environmental Health, Part A*. 2023;86(5):166-79.
52. Amorim MJB, Pereira C, Menezes-Oliveira VB, Campos B, Soares AMVM, Loureiro S. Assessing single and joint effects of chemicals on the survival and reproduction of *Folsomia candida* (Collembola) in soil. *Environ Pollut (Oxford, U K)*. 2012;160:145-52.
53. Sprague JB. Measurement of pollutant toxicity to fish. II. Utilizing and applying bioassay results. *Water Research*. 1970;4:3-32.
54. Bliss CI. The Toxicology of Poisons Applied Jointly. *Annals of Applied Biology*. 1939;26(3):585-615.
55. González-Naranjo V, Boltes K, de Bustamante I, Palacios-Díaz P. Environmental risk of combined emerging pollutants in terrestrial environments: chlorophyll a fluorescence analysis. *Environmental Science and Pollution Research*. 2015;22(9):6920-31.

56. Wang W, Zhang J, Wu J, Yu R, Zhang Y, Sun L, et al. Acute Toxicity and Ecotoxicological Risk Assessment of Three Volatile Pesticide Additives on the Earthworm—*Eisenia fetida*. *International Journal of Environmental Research and Public Health*. 2021;18(21):11232.
57. Wu S, An X, Wang D, Cao C, Wang Q, Wang Y. Co-exposure to deltamethrin and cyazofamid: variations in enzyme activity and gene transcription in the earthworm (*Eisenia fetida*). *Environmental Science and Pollution Research*. 2024;31(20):29174-84.
58. Meidl P, Lehmann A, Bi M, Breitenreiter C, Benkrama J, Li E, et al. Combined application of up to ten pesticides decreases key soil processes. *Environmental Science and Pollution Research*. 2024;31:11995–2004.
59. Rillig MC, Ryo M, Lehmann A, Aguilar-Trigueros CA, Buchert S, Wulf A, et al. The role of multiple global change factors in driving soil functions and microbial biodiversity. *Science*. 2019;366(6467):886-90.
60. Schäfer RB, Piggott JJ. Advancing understanding and prediction in multiple stressor research through a mechanistic basis for null models. *Global Change Biology*. 2018;24(5):1817-26.
61. Liess M, Foit K, Knillmann S, Schäfer RB, Liess H-D. Predicting the synergy of multiple stress effects. *Scientific Reports*. 2016;6(1):32965.
62. Wehrli M, Slotsbo S, Fomsgaard Inge S, Laursen Bente B, Gröning J, Liess M, et al. A Dirt(y) World in a Changing Climate: Importance of Heat Stress in the Risk Assessment of Pesticides for Soil Arthropods. *Global Change Biology*. 2024;30(10):e17542.
63. Bednarska AJ, Choczyński M, Laskowski R, Walczak M. Combined effects of chlorpyrifos, copper and temperature on acetylcholinesterase activity and toxicokinetics of the chemicals in the earthworm *Eisenia fetida*. *Environ Pollut (Oxford, U K)*. 2017;220:567-76.
64. Drocco C, Coors A, Devers M, Martin-Laurent F, Rouard N, Spor A. Evaluating the effects of environmental disturbances and pesticide mixtures on N-cycle related soil microbial endpoints. *Peer Community Journal*. 2025;5:article no. e33.
65. Li X, Wang M, Jiang R, Zheng L, Chen W. Evaluation of joint toxicity of heavy metals and herbicide mixtures in soils to earthworms (*Eisenia fetida*). *Journal of Environmental Sciences*. 2020;94:137-46.
